# Supplementary material
Source: ML conference proceedings conference paper supplement (https://proceedings.neurips.cc/paper_files/paper/2021/hash/29d74915e1b323676bfc28f91b3c4802-Abstract.html)
Supplement: Supplementary file 1 [file 29d74915e1b323676bfc28f91b3c4802-Supplemental.pdf]

## A Proof of Theorem 2.2

### A.1 Derivation of the self-consistent equation

We start from (16) and rely on the following power counting principles: Each derivative provides a smallness-factor of  $1/\sqrt{m}$  because  $G$  is a function of  $Y/\sqrt{m}$  and  $Y^*/\sqrt{m}$ , while each independent summation costs a factor of  $n_1 \sim m$ . However, we cannot have too many independent summations for if any index appears only once in the cumulant, then the latter vanishes identically by the independence property of cumulants. For example, if  $i_2, \dots, i_{2k} \neq i_1$ , then the random variables  $Y_{i_3 i_4}, \dots, Y_{i_{2k-1} i_{2k}}$  are independent of  $Y_{i_1 i_2}$  in the probability space of the random variables  $\{w_{i_1 a}\}_{a=1}^{n_0}$  conditioned on the remaining random variables. By the law of total expectation and the independence property it follows that

$$\kappa(Y_{i_1 i_2}, \dots, Y_{i_{2k-1} i_{2k}}) = 0$$

in this case. Thus we only need to sum over those cumulants in which each  $W$ - and  $X$ -index appears at least twice (we call  $i$  the  $W$ -index of  $Y_{ij}, Y_{ji}^*$  and  $j$  the  $X$ -index). In the extreme case where each  $W$ - and  $X$ -index appears exactly twice, we either have a single cycle, or a union of cycles on disjoint index sets. In the latter case the cumulant vanishes identically by the independence property. In the former case, for a cycle of length  $2k$  there are  $k$  indices each, we obtain a factor of  $n_1^{-1}$  from the normalised sum, a factor of  $m^{-2k/2} = m^{-k}$  from the derivatives, a factor of  $n_1^k m^k$  from the summations, and finally a factor of  $n_0^{1-k}$  from the cumulant in Proposition 3.2, i.e.

$$\frac{1}{n_1} \frac{1}{m^k} n_1^k m^k n_0^{1-k} \sim 1$$

and the power counting is neutral. On the contrary, when some index appears three times, the overall power counting described above is smaller by a factor of  $1/\sqrt{m}$ , and thus negligible to leading order. In particular this argument shows that cycles of odd length only negligible as they cannot arise on indices in which each  $W$ - and  $X$ -index appears exactly twice.

Thus, together with Proposition 3.2 we have (recalling that the shorthand notation  $\approx$  indicates equalities up to an error of  $n_0^{-1/2}$ )

$$\begin{aligned} 1 + z \mathbf{E}g &= \frac{1}{n_1 m} \sum_{k \geq 1} \sum_{i_1, \dots, i_{2k}} \frac{\kappa(Y_{i_1 i_2}, Y_{i_3 i_4}, Y_{i_5 i_6}, \dots, Y_{i_{2k-1} i_{2k}})}{(k-1)!} \mathbf{E} \partial_{Y_{i_3 i_4}} \cdots \partial_{Y_{i_{2k-1} i_{2k}}} (Y^* G)_{i_2 i_1} \\ &\approx \frac{1}{n_1 m} \sum_{k \geq 1} \sum_{i_1, \dots, i_{2k}}^* \kappa(Y_{i_1 i_2}, Y_{i_2 i_3}^*, Y_{i_3 i_4}, \dots, Y_{i_{2k} i_1}^*) \mathbf{E} \partial_{Y_{i_3 i_4}} \cdots \partial_{Y_{i_{2k-1} i_{2k}}} (Y^* G)_{i_2 i_1} \\ &= \frac{1}{n_1 m} \sum_{i_1, i_2}^* \kappa(Y_{i_1 i_2}, Y_{i_2 i_1}^*) \mathbf{E} \partial_{Y_{i_2 i_1}^*} (Y^* G)_{i_2 i_1} \\ &\quad + \frac{1}{n_1 m} \sum_{k \geq 2} \sum_{i_1, \dots, i_{2k}}^* \kappa(Y_{i_1 i_2}, Y_{i_2 i_3}^*, Y_{i_3 i_4}, \dots, Y_{i_{2k} i_1}^*) \mathbf{E} \partial_{Y_{i_2 i_3}^*} \cdots \partial_{Y_{i_{2k} i_1}^*} (Y^* G)_{i_2 i_1} \\ &\approx \frac{\theta_1}{n_1 m} \sum_{i_1, i_2}^* \mathbf{E} \partial_{Y_{i_2 i_1}^*} (Y^* G)_{i_2 i_1} + \frac{1}{n_1 m} \sum_{k \geq 2} \frac{\theta_2^k}{n_0^{k-1}} \sum_{i_1, \dots, i_{2k}}^* \mathbf{E} \partial_{Y_{i_2 i_3}^*} \cdots \partial_{Y_{i_{2k} i_1}^*} (Y^* G)_{i_2 i_1}, \end{aligned} \tag{21}$$

where the summations  $\sum^*$  are understood over pairwise distinct indices. Here in the second line the factorial  $(k-1)!$  disappears since there are exactly  $(k-1)!$  ways to map the variables  $Y_{i_3 i_4}, Y_{i_5 i_6}, \dots, Y_{i_{2k-1} i_{2k}}$  into  $Y_{i_2 i_3}^*, Y_{i_3 i_4}, \dots, Y_{i_{2k} i_1}^*$  with distinct  $i_1, \dots, i_{2k}$ . From this point onwards, we will omit reference to  $\mathbf{E}$  to simplify notation slightly.

We now need to compute the partial derivatives in (21). The proof of the following lemma is included in Appendix C.

**Lemma A.1.** Let  $G(z) = (M - z)^{-1}$ ,  $z \in \mathbb{H}$ , be the resolvent of the random matrix  $M = \frac{1}{m}YY^* \in \mathbb{R}^{n_1 \times n_1}$ . Then, it holds that

$$\partial_{Y_{i_2 i_3}^*} (Y^* G)_{i_2 i_1} = G_{i_1 i_1} \left( 1 - \left( \frac{Y^* G Y}{m} \right)_{i_2 i_2} \right), \quad (22a)$$

$$\partial_{Y_{i_2 i_3}^*} \cdots \partial_{Y_{i_2 k i_1}^*} (Y^* G)_{i_2 i_1} \approx -\partial_{Y_{i_3 i_4}} \cdots \partial_{Y_{i_2 k-1 i_2 k}} \left( \frac{G Y}{m} \right)_{i_3 i_2 k} G_{i_1 i_1} \left( 1 - \left( \frac{Y^* G Y}{m} \right)_{i_2 i_2} \right). \quad (22b)$$

Thus, using Lemma A.1 in (21) we have

$$\begin{aligned} 1 + zg &\approx \frac{\theta_1}{n_1 m} \sum_{i_1, i_2}^* G_{i_1 i_1} \left( 1 - \left( \frac{Y^* G Y}{m} \right)_{i_2 i_2} \right) \\ &\quad - \frac{1}{n_1 m} \sum_{k \geq 2} \frac{\theta_2^k}{n_0^{k-1}} \sum_{i_1, \dots, i_{2k}}^* \partial_{Y_{i_3 i_4}} \cdots \partial_{Y_{i_2 k-1 i_2 k}} \left( \frac{G Y}{m} \right)_{i_3 i_2 k} G_{i_1 i_1} \left( 1 - \left( \frac{Y^* G Y}{m} \right)_{i_2 i_2} \right) \\ &= \theta_1 g - \theta_1 \frac{n_1}{m} g \left\langle \frac{Y^* G Y}{m} \right\rangle \\ &\quad - \left( g - \frac{n_1}{m} g \left\langle \frac{Y^* G Y}{m} \right\rangle \right) \frac{1}{m} \sum_{k \geq 2} \frac{\theta_2^k}{n_0^{k-1}} \sum_{i_3, \dots, i_{2k}}^* \partial_{Y_{i_3 i_4}} \cdots \partial_{Y_{i_2 k-1 i_2 k}} (G Y)_{i_3 i_2 k}, \end{aligned} \quad (23)$$

where  $\left\langle \frac{Y^* G Y}{m} \right\rangle := \frac{1}{n_1} \text{Tr} \frac{Y^* G Y}{m} = 1 + zg$  from (15). Again, we stress that the equalities are meant in expectation. Moreover, shifting the index in the above summation, we get

$$\begin{aligned} &\frac{1}{m} \sum_{k \geq 2} \frac{\theta_2^k}{n_0^{k-1}} \sum_{i_3, \dots, i_{2k}}^* \partial_{Y_{i_3 i_4}} \cdots \partial_{Y_{i_2 k-1 i_2 k}} (G Y)_{i_3 i_2 k} \\ &= \theta_2 \frac{n_1}{n_0} \frac{1}{m} \sum_{k \geq 1} \frac{\theta_2^k}{n_1 n_0^{k-1}} \sum_{i_3, \dots, i_{2k+2}}^* \partial_{Y_{i_3 i_4}} \cdots \partial_{Y_{i_2 k+1 i_2 k+2}} (G Y)_{i_3 i_2 k+2} \\ &= \theta_2^2 \frac{n_1}{n_0} \frac{1}{n_1 m} \sum_{i_3, i_4}^* \partial_{Y_{i_3 i_4}} (G Y)_{i_3 i_4} \\ &\quad + \theta_2 \frac{n_1}{n_0} \frac{1}{n_1 m} \sum_{k \geq 2} \frac{\theta_2^k}{n_0^{k-1}} \sum_{i_3, \dots, i_{2k+2}}^* \partial_{Y_{i_3 i_4}} \cdots \partial_{Y_{i_2 k+1 i_2 k+2}} (G Y)_{i_3 i_2 k+2} \\ &\approx \theta_2^2 \frac{n_1}{n_0} \left( g - \frac{n_1}{m} g \left\langle \frac{Y^* G Y}{m} \right\rangle \right) + \theta_2 \frac{n_1}{n_0} \left( 1 + zg - \theta_1 g + \theta_1 \frac{n_1}{m} g \left\langle \frac{Y^* G Y}{m} \right\rangle \right) \\ &= \theta_2 \frac{n_1}{n_0} (1 + zg) - \theta_2 (\theta_1 - \theta_2) \frac{n_1}{n_0} g \left( 1 - \frac{n_1}{m} (1 + zg) \right), \end{aligned}$$

where in the third step we used (21). Finally, together with (23), we have

$$\begin{aligned} 1 + zg &\approx \theta_1 g \left( 1 - \frac{n_1}{m} (1 + zg) \right) - \theta_2 \frac{n_1}{n_0} g (1 + zg) \left( 1 - \frac{n_1}{m} (1 + zg) \right) \\ &\quad + \theta_2 (\theta_1 - \theta_2) \frac{n_1}{n_0} g^2 \left( 1 - \frac{n_1}{m} (1 + zg) \right)^2, \end{aligned} \quad (24)$$

which corresponds to the desired equation (6) as  $n_0, n_1, m \rightarrow \infty$ . Thus, (24) combined with the concentration inequality given in Lemma 3.4 completes the proof of Theorem 2.2.

*Proof of Theorem 2.2.* We need to show the concentration w.r.t.  $\mathbf{E}_{W, X} \equiv \mathbf{E}$ . By the triangle and Jensen inequality we have

$$\begin{aligned} \mathbf{E}|g(z) - \mathbf{E}g(z)|^4 &\lesssim \mathbf{E}|g(z) - \mathbf{E}_W g(z)|^4 + \mathbf{E}_X |\mathbf{E}_W g(z) - \mathbf{E}g(z)|^4 \\ &\leq \mathbf{E}_X \left( \mathbf{E}_W |g(z) - \mathbf{E}_W g(z)|^4 \right) + \mathbf{E}_W \left( \mathbf{E}_X |g(z) - \mathbf{E}_X g(z)|^4 \right) \lesssim \frac{2}{n_1^2 (\Im z)^4} \end{aligned}$$

and thus the almost sure convergence follows from the Borel-Cantelli Lemma, completing the proof of Theorem 2.2 together with (24).  $\square$

## A.2 Proof of Proposition 3.2

In light of the central limit theorem, we have that in the asymptotic limit the random variables

$$\left(\frac{WX}{\sqrt{n_0}}\right)_{ij} = \frac{1}{\sqrt{n_0}} \sum_{k=1}^{n_0} W_{ik} X_{kj},$$

are approximately  $\mathcal{N}(0, \sigma_w^2 \sigma_x^2)$ -normally distributed. Our next goal is to compute their cumulants. The first cumulant or expectation vanishes identically. For the second cumulant we obtain:

**Lemma A.2.** *The cumulant of  $\frac{(WX)_{i_1 i_2}}{\sqrt{n_0}}$  and  $\frac{(WX)_{i_3 i_4}}{\sqrt{n_0}}$  is nonzero only if  $i_1 = i_3$  and  $i_2 = i_4$ , and in this case it holds that*

$$\kappa\left(\frac{(WX)_{i_1 i_2}}{\sqrt{n_0}}, \frac{(WX)_{i_2 i_1}^*}{\sqrt{n_0}}\right) = \sigma_w^2 \sigma_x^2.$$

*Proof.* We have

$$\begin{aligned} \kappa\left(\frac{(WX)_{i_1 i_2}}{\sqrt{n_0}}, \frac{(WX)_{i_3 i_4}}{\sqrt{n_0}}\right) &= \frac{1}{n_0} \mathbf{E}(WX)_{i_1 i_2} (WX)_{i_3 i_4} \\ &= \frac{1}{n_0} \sum_{k_1, k_2=1}^{n_0} \mathbf{E} W_{i_1 k_1} X_{k_1 i_2} W_{i_3 k_2} X_{k_2 i_4} \\ &= \frac{1}{n_0} \sum_{k_1=1}^{n_0} \delta_{i_1 i_3} \delta_{i_2 i_4} \mathbf{E} W_{i_1 k_1}^2 X_{k_1 i_2}^2 = \delta_{i_1 i_3} \delta_{i_2 i_4} \sigma_w^2 \sigma_x^2. \end{aligned}$$

Thus, the second cumulant is nonzero if  $i_1 = i_3$  and  $i_2 = i_4$ , and in this case it is exactly the variance of the random variable  $\frac{(WX)_{ij}}{\sqrt{n_0}}$ .  $\square$

We now consider four random entries, and we compute

$$\frac{1}{n_0^2} \kappa\left((WX)_{i_1 i_2}, (WX)_{i_3 i_4}, (WX)_{i_5 i_6}, (WX)_{i_7 i_8}\right).$$

We observe that the cumulant vanishes identically if any index appears exactly once by the independence property, and thus each  $W$ - and  $X$ -index must appear exactly twice. This is only possible if we have two cycles on two indices each, or a single four-cycle. The cumulant of the former vanishes identically by independence and thus the only non-vanishing 4-cumulant is

$$\begin{aligned} &\kappa\left(\frac{(WX)_{i_1 i_2}}{\sqrt{n_0}}, \frac{(WX)_{i_2 i_3}^*}{\sqrt{n_0}}, \frac{(WX)_{i_3 i_4}}{\sqrt{n_0}}, \frac{(WX)_{i_4 i_1}^*}{\sqrt{n_0}}\right) \\ &= \frac{1}{n_0^2} \mathbf{E}(WX)_{i_1 i_2} (WX)_{i_2 i_3}^* (WX)_{i_3 i_4} (WX)_{i_4 i_1}^* \\ &= \frac{1}{n_0^2} \sum_{k_1, k_2, k_3, k_4=1}^{n_0} \mathbf{E} W_{i_1 k_1} X_{k_1 i_2} W_{i_3 k_2} X_{k_2 i_2} W_{i_3 k_3} X_{k_3 i_4} W_{i_1 k_4} X_{k_4 i_4} \\ &= \frac{1}{n_0^2} \sum_{k_1=1}^{n_0} \mathbf{E} W_{i_1 k_1}^2 X_{k_1 i_2}^2 W_{i_3 k_1}^2 X_{k_1 i_4}^2 = \frac{(\sigma_w^2 \sigma_x^2)^2}{n_0} \end{aligned}$$

Here for the first equality we used (14) where all but the trivial partition vanish identically since in some expectation a single index appears. This result can be generalised:

**Lemma A.3.** *For  $k \geq 2$  and pairwise distinct indices we have*

$$\kappa\left(\frac{(WX)_{i_1 i_2}}{\sqrt{n_0}}, \frac{(WX)_{i_2 i_3}^*}{\sqrt{n_0}}, \frac{(WX)_{i_3 i_4}}{\sqrt{n_0}}, \dots, \frac{(WX)_{i_{2k} i_1}^*}{\sqrt{n_0}}\right) = \frac{(\sigma_w^2 \sigma_x^2)^k}{n_0^{k-1}} + \mathcal{O}(n_0^{-k}).$$

*Proof.* As illustrated for the case with four random variables, to have a nonzero cumulant, we can encode the  $2k$  random variables as a cycle graph of length  $2k$ . Then, the only contribution comes from

$$\kappa\left(\frac{(WX)_{i_1 i_2}}{\sqrt{n_0}}, \dots, \frac{(WX)_{i_{2k} i_1}^*}{\sqrt{n_0}}\right) = \frac{1}{n_0^k} \mathbf{E}(WX)_{i_1 i_2} \cdots (WX)_{i_{2k} i_1}^* = \frac{(\sigma_w^2 \sigma_x^2)^k}{n_0^{k-1}} + \mathcal{O}(n_0^{-k}),$$

which completes the proof.  $\square$

Finally, we compute the cumulants of the entries of the random matrix  $Y$ . Since the activation function  $f$  is applied component-wise, it follows from the previous results that the only contribution comes from  $\kappa(Y_{i_1 i_2}, Y_{i_2 i_3}^*, Y_{i_3 i_4}, \dots, Y_{i_{2k} i_1}^*)$  for  $k \geq 1$  and  $i_1, \dots, i_{2k}$  distinct, thus proving that  $Y$  has cycle correlations.

*Proof of Proposition 3.2.* From the Berry-Esséen Theorem it follows that

$$\begin{aligned} \kappa(Y_{ij}) &= \mathbf{E}Y_{ij} = \int_{\mathbb{R}} f(x) \frac{e^{-x^2/2\sigma_w^2\sigma_x^2}}{\sigma_w\sigma_x\sqrt{2\pi}} dx + \mathcal{O}(n_0^{-1/2}) \\ &= \int_{\mathbb{R}} f(\sigma_w\sigma_x x) \frac{e^{-x^2/2}}{\sqrt{2\pi}} dx + \mathcal{O}(n_0^{-1/2}) = \mathcal{O}(n_0^{-1/2}), \end{aligned}$$

and

$$\kappa(Y_{ij}, Y_{ji}^*) = (1 + \mathcal{O}(n_0^{-1/2})) \int_{\mathbb{R}} f^2(\sigma_w\sigma_x x) \frac{e^{-x^2/2}}{\sqrt{2\pi}} dx = \theta_1(f)(1 + \mathcal{O}(n_0^{-1/2})),$$

since the random variables  $(WX)_{ij}/\sqrt{n_0}$  are approximately centred Gaussian with variance  $\sigma_w^2\sigma_x^2$ . Let  $k > 1$ . Then, since  $f$  is a smooth function with compact support, we have that  $f$  is in  $C^l$  for some integer  $l > 1 + \frac{2k^2}{k-1}$ . Using the Fourier inversion theorem, it follows that

$$\begin{aligned} f(x_1) &= \frac{1}{2\pi} \int_{\mathbb{R}} \hat{f}(t_1) e^{it_1 x_1} dt_1 \\ &= \frac{1}{2\pi} \int_{|t_1| \leq n_0^{\frac{k-1}{2k}}} \hat{f}(t_1) e^{it_1 x_1} dt_1 + \frac{1}{2\pi} \int_{|t_1| > n_0^{\frac{k-1}{2k}}} \hat{f}(t_1) e^{it_1 x_1} dt_1 \\ &= \frac{1}{2\pi} \int_{|t_1| \leq n_0^{\frac{k-1}{2k}}} \hat{f}(t_1) e^{it_1 x_1} dt_1 + \mathcal{O}\left((n_0^{\frac{k-1}{2k}})^{1-l}\right), \end{aligned}$$

where we used  $|\hat{f}(t_1)| \leq \frac{c}{(1+|t_1|)^l}$ , for some positive constant  $c$ . For notational simplicity we work in the case  $k = 2$ , but the argument when  $k > 2$  is the same. We compute

$$\begin{aligned} &\kappa(Y_{i_1 i_2}, Y_{i_2 i_3}^*, Y_{i_3 i_4}, Y_{i_4 i_1}^*) \\ &= \frac{1}{(2\pi)^4} \int_{\forall i, |t_i| \leq n_0^{\frac{1}{4}}} \hat{f}(t_1) \hat{f}(t_2) \hat{f}(t_3) \hat{f}(t_4) \kappa(e^{it_1 Z_{i_1 i_2}}, e^{it_2 Z_{i_2 i_3}^*}, e^{it_3 Z_{i_3 i_4}}, e^{it_4 Z_{i_4 i_1}^*}) dt + \mathcal{O}(n_0^{-2}), \\ &= \frac{1}{(2\pi)^4} \sum_{l_1, \dots, l_4 \geq 1} \int_{\forall i, |t_i| \leq n_0^{\frac{1}{4}}} \prod_{i=1}^4 \left( \hat{f}(t_i) \frac{(it_i)^{l_i}}{l_i!} \right) \kappa((Z_{i_1 i_2})^{l_1}, (Z_{i_2 i_3}^*)^{l_2}, (Z_{i_3 i_4})^{l_3}, (Z_{i_4 i_1}^*)^{l_4}) dt + \mathcal{O}(n_0^{-2}) \end{aligned}$$

where we introduced  $Z := WX/\sqrt{n_0}$  and in the second equality used that any cumulant involving the deterministic 1 vanishes identically. We now expand the cumulant involving powers of  $Z$  via the well known formula [21, Theorem 11.30] in terms of partitions of the set  $\{1, \dots, l_1 + l_2 + l_3 + l_4\}$  whose joint with the partition  $\{\{1, \dots, l_1\}, \dots, \{l_1 + l_2 + l_3 + 1, \dots, l_1 + l_2 + l_3 + l_4\}\}$  is the trivial partition. By the independence property it is clear that the leading contribution comes from those partitions with one block connecting one copy of each of  $Z_{i_1 i_2}, Z_{i_2 i_3}^*, Z_{i_3 i_4}, Z_{i_4 i_1}^*$  and the remaining

blocks being internal pairings. Since for odd  $l_i$  there are  $l_i!! \cdots l_4!!$  such partitions it follows that

$$\begin{aligned}
& \kappa(Y_{i_1 i_2}, Y_{i_2 i_3}^*, Y_{i_3 i_4}, Y_{i_4 i_1}^*) \\
&= \frac{1}{(2\pi)^4} \sum_{\substack{l_1, \dots, l_4 \geq 1 \\ l_i \text{ odd}}} \int_{\forall i, |t_i| \leq n_0^{-\frac{1}{4}}} \prod_{i=1}^4 \left( \hat{f}(t_i) \frac{(it_i)^{l_i}}{(l_i - 1)!!} \right) \kappa(Z_{i_1 i_2}, Z_{i_2 i_3}^*, Z_{i_3 i_4}, Z_{i_4 i_1}^*) \\
&\quad \times \text{Var}(Z_{i_1 i_2})^{(l_1-1)/2} \cdots \text{Var}(Z_{i_4 i_1}^*)^{(l_4-1)/2} dt + \mathcal{O}(n_0^{-3/2}) \\
&= \frac{\sigma_w^4 \sigma_x^4}{n_0} \frac{1}{(2\pi)^4} \sum_{k_1, \dots, k_4 \geq 0} \int_{\forall i, |t_i| \leq n_0^{-\frac{1}{4}}} t_1 t_2 t_3 t_4 \prod_{i=1}^4 \left( \hat{f}(t_i) \frac{(-\sigma_w^2 \sigma_x^2 t_i^2 / 2)^{k_i}}{k_i!} \right) dt + \mathcal{O}(n_0^{-3/2}) \\
&= \frac{1}{n_0} \left( \sigma_w \sigma_x \frac{1}{2\pi} \int \hat{f}'(t) e^{-\sigma_w^2 \sigma_x^2 t^2 / 2} dt \right)^4 + \mathcal{O}(n_0^{-3/2}),
\end{aligned}$$

where in the penultimate step we used Lemmata A.2–A.3 and in the ultimate step we used the Fourier property  $\hat{f}'(t) = it\hat{f}(t)$ . Together with

$$\begin{aligned}
\frac{\sigma_w \sigma_x}{2\pi} \int \hat{f}'(t) e^{-\sigma_w^2 \sigma_x^2 t^2 / 2} dt &= \frac{1}{\sqrt{2\pi}} \int f'(x) e^{-x^2 / 2\sigma_w^2 \sigma_x^2} dx \\
&= \sigma_w \sigma_x \int f'(\sigma_w \sigma_x x) \frac{e^{-x^2 / 2}}{\sqrt{2\pi}} dx = \theta_2(f)^{1/2}.
\end{aligned}$$

we conclude

$$\kappa(Y_{i_1 i_2}, Y_{i_2 i_3}^*, Y_{i_3 i_4}, Y_{i_4 i_1}^*) = \theta_2(f)^2 n_0^{-1} \left( 1 + \mathcal{O}(n_0^{-1/2}) \right),$$

just as claimed.  $\square$

## B Proof of Theorem 2.5

### B.1 Derivation of the self-consistent equation

We proceed as in Subsection A.1. We know from (15) that

$$\frac{1}{m} \sum_{i=1}^m \left( \frac{Y^* G Y}{m} \right)_{ii} = \frac{n_1}{m} \left\langle \frac{Y Y^* G}{m} \right\rangle = \frac{n_1}{m} (1 + zg). \quad (25)$$

We further claim the following.

**Lemma B.1.** *It holds that*

$$\frac{1}{m} \sum_{i=1}^m \sum_{j=1}^{n_1} \left( \frac{Y^* G Y}{m} \right)_{ij} = 1 + \mathcal{O}((\theta_{1,b}(f) n_1)^{-1}). \quad (26)$$

Together with (25), Lemma B.1 implies

$$\frac{1}{m} \sum_{i \neq j} \left( \frac{Y^* G Y}{m} \right)_{ij} \approx 1 - \frac{n_1}{m} (1 + zg). \quad (27)$$

*Proof.* Using the Woodbury matrix identity<sup>3</sup>, we have

$$\frac{1}{m} \left( \frac{Y^* G Y}{m} \right) = \frac{1}{m^2} Y^* \left( \frac{Y Y^*}{m} - z \right)^{-1} Y = \frac{1}{m} + \frac{z}{m} \left( \frac{Y^* Y}{m} - z \right)^{-1},$$

<sup>3</sup>For  $A \in \mathbb{R}^{n \times n}$ ,  $C \in \mathbb{R}^{r \times r}$ ,  $U \in \mathbb{R}^{n \times r}$  and  $V \in \mathbb{R}^{r \times n}$  the Woodbury matrix identity is given by

$$(A + UCV)^{-1} = A^{-1} - A^{-1}U(C^{-1} + VA^{-1}U)^{-1}VA^{-1}.$$

which implies

$$\sum_{i,j} \frac{1}{m} \left( \frac{Y^*GY}{m} \right)_{ij} = \sum_{i,j} \frac{1}{m} \delta_{ij} + \sum_{i,j} \frac{z}{m} \left( \frac{Y^*Y}{m} - z \right)_{ij}^{-1} = 1 + \sum_{i,j} \frac{z}{m} \left( \frac{Y^*Y}{m} - z \right)_{ij}^{-1}.$$

So, we need to show that  $\sum_{i,j} \frac{z}{m} \left( \frac{Y^*Y}{m} - z \right)_{ij}^{-1}$  is approximately zero. Let  $e := \frac{1}{\sqrt{m}}[1 \dots 1]^T$  be a normalized vector in  $\mathbb{R}^m$ . We then write

$$\sum_{i,j} \frac{z}{m} \left( \frac{Y^*Y}{m} - z \right)_{ij}^{-1} = z \langle e, \left( \frac{Y^*Y}{m} - z \right)^{-1} e \rangle.$$

It turns out that  $e$  is approximately an eigenvector of  $\frac{1}{m}Y^*Y$ . Indeed, it holds that

$$\mathbf{E} \left( \frac{Y^*Y}{m} e \right)_i = \frac{1}{m\sqrt{m}} \sum_{j=1}^m \sum_{k=1}^{n_1} \mathbf{E} Y_{ik}^* Y_{kj} \approx m^{-1/2} n_1 \theta_{1,b}(f) = (n_1 \theta_{1,b}(f)) e_i.$$

Moreover, the variance is approximately  $\mathcal{O}(n_1/m)$ , which means that the standard deviation is of order 1, while the expectation of order  $n_1$ . Thus,  $e$  is approximately an eigenvector of  $\frac{1}{m}Y^*Y$  with eigenvalue  $n_1 \theta_{1,b}(f)$ . Since  $\theta_{1,b}(f)$  is nonzero by assumption, we have that  $e$  is approximately an eigenvector of the matrix  $\left( \frac{Y^*Y}{m} - z \mathbf{1}_m \right)^{-1}$  with eigenvalue  $(n_1 \theta_{1,b}(f) - z)^{-1}$ , from which the result follows:

$$\left| \langle e, \left( \frac{Y^*Y}{m} - z \right)^{-1} e \rangle \right| \approx |(n_1 \theta_{1,b}(f) - z)^{-1}| \ll 1. \quad \square$$

Given Lemma B.1 and Proposition 3.3, we can now prove the global law for the random matrix  $M$  with the cycle correlations.

*Proof of Theorem 2.5.* Applying Proposition 3.3 to (16) and using the same power counting argument as in (21) we obtain

$$\begin{aligned} 1 + zg &\approx \frac{1}{n_1 m} \sum_{i_1, i_2}^* \kappa(Y_{i_1 i_2}, Y_{i_2 i_1}^*) \partial_{Y_{i_2 i_1}^*} (Y^*G)_{i_2 i_1} + \frac{1}{n_1 m} \sum_{i_1, i_2, i_3}^* \kappa(Y_{i_1 i_2}, Y_{i_3 i_1}^*) \partial_{Y_{i_3 i_1}^*} (Y^*G)_{i_2 i_1} \\ &\quad + \frac{1}{n_1 m} \sum_{k \geq 2} \sum_{i_1, \dots, i_{2k}}^* \kappa(Y_{i_1 i_2}, \dots, Y_{i_{2k} i_1}^*) \partial_{Y_{i_2 i_3}^*} \cdots \partial_{Y_{i_{2k} i_1}^*} (Y^*G)_{i_2 i_1} \\ &\approx \frac{\theta_1(f)}{n_1 m} \sum_{i_1, i_2}^* \partial_{Y_{i_2 i_1}^*} (Y^*G)_{i_2 i_1} + \frac{\theta_{1,b}(f)}{n_1 m} \sum_{i_1} \sum_{i_2, i_3}^* \partial_{Y_{i_3 i_1}^*} (Y^*G)_{i_2 i_1} \\ &\quad + \frac{1}{n_1 m} \sum_{k \geq 2} \frac{\theta_2^k(f)}{n_0^{k-1}} \sum_{i_1, \dots, i_{2k}}^* \partial_{Y_{i_2 i_3}^*} \cdots \partial_{Y_{i_{2k} i_1}^*} (Y^*G)_{i_2 i_1}, \end{aligned} \quad (28)$$

where we omitted reference to  $\mathbf{E}$  to simplify notation. Given Lemma A.1, we only need to compute  $\partial_{Y_{i_3 i_1}^*} (Y^*G)_{i_2 i_1}$ :

$$\partial_{Y_{i_3 i_1}^*} (Y^*G)_{i_2 i_1} = \sum_{j=1}^{n_1} \partial_{Y_{i_3 i_1}^*} (Y_{i_2 j}^* G_{j i_1}) \approx -G_{i_1 i_1} \left( \frac{Y^*GY}{m} \right)_{i_2 i_3},$$

where we omitted the contribution of  $\partial_{Y_{i_3 i_1}^*} Y_{i_2 j}^*$  since it is very small. Plugging the partial derivatives into (28), we get

$$\begin{aligned}
1 + zg &\approx \frac{\theta_1(f)}{n_1 m} \sum_{i_1, i_2}^* G_{i_1 i_1} \left( 1 - \left( \frac{Y^* G Y}{m} \right)_{i_2 i_2} \right) - \frac{\theta_{1,b}(f)}{n_1 m} \sum_{i_1} \sum_{i_2, i_3}^* G_{i_1 i_1} \left( \frac{Y^* G Y}{m} \right)_{i_2 i_3} \\
&\quad - \frac{1}{n_1 m} \sum_{k \geq 2} \frac{\theta_2^k(f)}{n_0^{k-1}} \sum_{i_1, \dots, i_{2k}}^* \partial_{Y_{i_3 i_4}} \cdots \partial_{Y_{i_{2k-1} i_{2k}}} \left( \frac{G Y}{m} \right)_{i_3 i_{2k}} G_{i_1 i_1} \left( 1 - \left( \frac{Y^* G Y}{m} \right)_{i_2 i_2} \right) \\
&\approx \theta_1(f) g \left( 1 - \frac{n_1}{m} (1 + zg) \right) - \theta_{1,b}(f) g \left( 1 - \frac{n_1}{m} (1 + zg) \right) \\
&\quad - g \left( 1 - \frac{n_1}{m} (1 + zg) \right) \sum_{k \geq 2} \frac{\theta_2^k}{n_0^{k-1}} \sum_{i_3, \dots, i_{2k}}^* \partial_{Y_{i_3 i_4}} \cdots \partial_{Y_{i_{2k-1} i_{2k}}} \left( \frac{G Y}{m} \right)_{i_3 i_{2k}},
\end{aligned}$$

where in the second step we used (25) and (27). Finally, by shifting the index in the summation and doing some simple bookkeeping, we have

$$\begin{aligned}
1 + zg &\approx (\theta_1 - \theta_{1,b}) g \left( 1 - \frac{n_1}{m} (1 + zg) \right) - \theta_2 \frac{n_1}{n_0} g (1 + zg) \left( 1 - \frac{n_1}{m} (1 + zg) \right) \\
&\quad + \theta_2 (\theta_1 - \theta_{1,b} - \theta_2) \frac{n_1}{n_0} g^2 \left( 1 - \frac{n_1}{m} (1 + zg) \right)^2,
\end{aligned}$$

which corresponds to the self-consistent equation (6) as  $n_0, n_1, m \rightarrow \infty$ , where  $\theta_1$  is replaced by  $\theta_1 - \theta_{1,b}$ . In the same way as in the bias-free case, the concentration inequality of Lemma 3.4 can also be applied here, thereby concluding that  $g$  is approximately equal to its mean with high probability. The first claim of Theorem 2.5 then follows. The second claim follows easily from Lemma B.1. Since  $n_1 \theta_{1,b}(f)$  is approximately an eigenvalue of the random matrix  $\frac{1}{m} Y^* Y$ , and since the nonzero eigenvalues of  $Y^* Y$  are the same as the one of  $Y Y^*$ , we have that  $\lambda_{\max} \approx n_1 \theta_{1,b}(f)$  is an eigenvalue of  $M$  located away from the rest of the spectrum (called *outlier*). This concludes the proof of Theorem 2.5.  $\square$

## B.2 Proof of Proposition 3.3

In light of the central limit theorem, in the asymptotic limit the random variables  $\frac{(WX)_{ij}}{\sqrt{n_0}} + B_i$  are approximately normally distributed with zero mean and variance  $\sigma_w^2 \sigma_x^2 + \sigma_b^2$ . In contrast to the bias-free case, here we have two different nonzero second cumulants of the entries of the random matrix  $\frac{WX}{\sqrt{n_0}} + B$ , and therefore also of the  $Y_{ij}$ 's.

*Proof of Proposition 3.3.* The first identity follows in a straightforward manner by assumption (8):

$$\kappa(Y_{ij}) = \mathbf{E} Y_{ij} = \int_{\mathbb{R}} f(x) \frac{e^{-x^2/2(\sigma_w^2 \sigma_x^2 + \sigma_b^2)}}{\sqrt{2\pi(\sigma_w^2 \sigma_x^2 + \sigma_b^2)}} dx + \mathcal{O}(n_0^{-1/2}) = \mathcal{O}(n_0^{-1/2}).$$

For the second cumulant, we first compute

$$\begin{aligned}
\kappa \left( \frac{(WX)_{i_1 i_2}}{\sqrt{n_0}} + B_{i_1}, \frac{(WX)_{i_3 i_4}}{\sqrt{n_0}} + B_{i_3} \right) &= \mathbf{E} \left( \frac{(WX)_{i_1 i_2}}{\sqrt{n_0}} + B_{i_1} \right) \left( \frac{(WX)_{i_3 i_4}}{\sqrt{n_0}} + B_{i_3} \right) \\
&= \frac{1}{n_0} \mathbf{E} (WX)_{i_1 i_2} (WX)_{i_3 i_4} + \mathbf{E} B_{i_1} B_{i_3} \\
&= \delta_{i_1 i_3} \delta_{i_2 i_4} \sigma_w^2 \sigma_x^2 + \delta_{i_1 i_3} \sigma_b^2.
\end{aligned}$$

For  $i_1 = i_3$  and  $i_2 = i_4$ , the cumulant  $\kappa(Y_{i_1 i_2}, Y_{i_2 i_1}^*)$  follows easily:

$$\kappa(Y_{i_1 i_2}, Y_{i_2 i_1}^*) = (1 + \mathcal{O}(n_0^{-1/2})) \int_{\mathbb{R}} f^2(x) \frac{e^{-x^2/2(\sigma_w^2 \sigma_x^2 + \sigma_b^2)}}{\sqrt{2\pi(\sigma_w^2 \sigma_x^2 + \sigma_b^2)}} dx = \theta_1(f) (1 + \mathcal{O}(n_0^{-1/2})).$$

On the other hand, for  $i_1 = i_3$  and  $i_2 \neq i_4$ , to compute the cumulant  $\kappa(Y_{i_1 i_2}, Y_{i_4 i_1}^*)$ , we need the characteristic function of  $\frac{(WX)_{i_1 i_2}}{\sqrt{n_0}} + B_{i_1}$  and  $\frac{(WX)_{i_4 i_1}^*}{\sqrt{n_0}} + B_{i_1}$  which turns out to be asymptotically

equal to

$$\exp\left(-\frac{\sigma_w^2\sigma_x^2 + \sigma_b^2}{2}(t_1^2 + t_2^2) - \sigma_b^2 t_1 t_2\right).$$

Now, we can compute the cumulant of  $Y_{i_1 i_2}$  and  $Y_{i_4 i_1}^*$ :

$$\begin{aligned}\kappa(Y_{i_1 i_2}, Y_{i_4 i_1}^*) &\approx \frac{1}{(2\pi)^2} \int_{\mathbb{R}^2} f(x_1) f(x_2) e^{-it \cdot \mathbf{x}} \exp\left(-\frac{\sigma_w^2\sigma_x^2 + \sigma_b^2}{2}(t_1^2 + t_2^2) - \sigma_b^2 t_1 t_2\right) d\mathbf{t} d\mathbf{x} \\ &= \frac{1}{(2\pi)^2} \int_{\mathbb{R}^2} \hat{f}(t_1) \hat{f}(t_2) \exp\left(-\frac{\sigma_w^2\sigma_x^2 + \sigma_b^2}{2}(t_1^2 + t_2^2) - \sigma_b^2 t_1 t_2\right) dt_1 dt_2,\end{aligned}$$

where in the second step we applied the Fourier inversion theorem. We denote the covariance matrix  $\Sigma$  by

$$\Sigma := \begin{pmatrix} \sigma_w^2\sigma_x^2 + \sigma_b^2 & \sigma_b^2 \\ \sigma_b^2 & \sigma_w^2\sigma_x^2 + \sigma_b^2 \end{pmatrix} \quad (29)$$

with determinant  $\det(\Sigma) = \sigma_w^2\sigma_x^2(\sigma_w^2\sigma_x^2 + 2\sigma_b^2)$  and inverse matrix

$$\Sigma^{-1} = \frac{1}{\det(\Sigma)} \begin{pmatrix} \sigma_w^2\sigma_x^2 + \sigma_b^2 & -\sigma_b^2 \\ -\sigma_b^2 & \sigma_w^2\sigma_x^2 + \sigma_b^2 \end{pmatrix}.$$

Again applying the Fourier inversion formula, we obtain

$$\begin{aligned}\kappa(Y_{i_1 i_2}, Y_{i_4 i_1}^*) &\approx \frac{1}{(2\pi)^2} \int_{\mathbb{R}^2} \hat{f}(t_1) \hat{f}(t_2) e^{-\frac{1}{2}\langle \mathbf{t}, \Sigma \mathbf{t} \rangle} d\mathbf{t} \\ &= \frac{1}{(2\pi)^2} \int_{\mathbb{R}^2} f(x_1) f(x_2) \frac{2\pi}{\sqrt{\det(\Sigma)}} e^{-\frac{1}{2}\langle \mathbf{x}, \Sigma^{-1} \mathbf{x} \rangle} d\mathbf{x} \\ &= \frac{1}{2\pi \sqrt{\sigma_w^2\sigma_x^2(\sigma_w^2\sigma_x^2 + 2\sigma_b^2)}} \int_{\mathbb{R}^2} f(x_1) f(x_2) e^{-\frac{1}{2}\langle \mathbf{x}, \Sigma^{-1} \mathbf{x} \rangle} d\mathbf{x} = \theta_{1,b}(f),\end{aligned}$$

where

$$e^{-\frac{1}{2}\langle \mathbf{x}, \Sigma^{-1} \mathbf{x} \rangle} = \exp\left(-\frac{(\sigma_w^2\sigma_x^2 + \sigma_b^2)(x_1^2 + x_2^2) - 2\sigma_b^2 x_1 x_2}{2\sigma_w^2\sigma_x^2(\sigma_w^2\sigma_x^2 + 2\sigma_b^2)}\right).$$

To complete the proof, it remains to compute the joint cumulant of  $Y_{i_1 i_2}, Y_{i_2 i_3}^*, Y_{i_3 i_4}, \dots, Y_{i_{2k} i_{2k-1}}^*$  for  $k > 1$  and  $i_1, \dots, i_{2k}$  distinct. For notational simplicity, we prove the statement for  $k = 2$ . First, we use the cumulant asymptotics in order to asymptotically compute the characteristic function. The cumulants have match those of the bias-free case, except for

$$\kappa\left(\frac{(WX)_{i_1 i_2}}{\sqrt{n_0}} + B_{i_1}, \frac{(WX)_{i_1 i_2}}{\sqrt{n_0}} + B_{i_1}\right) = \sigma_w^2\sigma_x^2 + \sigma_b^2.$$

In addition to all these cumulants, we also have

$$\kappa\left(\frac{(WX)_{i_1 i_2}}{\sqrt{n_0}} + B_{i_1}, \frac{(WX)_{i_4 i_1}^*}{\sqrt{n_0}} + B_{i_1}\right) = \kappa\left(\frac{(WX)_{i_2 i_3}^*}{\sqrt{n_0}} + B_{i_3}, \frac{(WX)_{i_3 i_4}}{\sqrt{n_0}} + B_{i_3}\right) = \sigma_b^2.$$

Therefore, the log-characteristic function is given by

$$\begin{aligned}& -\frac{\sigma_w^2\sigma_x^2 + \sigma_b^2}{2} \sum_{i=1}^4 t_i^2 - \sigma_b^2(t_1 t_4 + t_2 t_3) + \sum_{n \geq 1} \frac{(-1)^{n-1}}{n} \left( \frac{(\sigma_w^2\sigma_x^2)^2}{n_0} \prod_{i=1}^4 t_i + \mathcal{O}(n_0^{-2}) \right)^n \\ &= -\frac{\sigma_w^2\sigma_x^2 + \sigma_b^2}{2} \sum_{i=1}^4 t_i^2 - \sigma_b^2(t_1 t_4 + t_2 t_3) + \log\left(1 + \frac{(\sigma_w^2\sigma_x^2)^2}{n_0} \prod_{i=1}^4 t_i + \mathcal{O}(n_0^{-2})\right),\end{aligned}$$

for  $t_1, t_2, t_3, t_4 \in \mathbb{R}$  such that  $|t_i| < n_0^{1/4}$ . We obtain the characteristic function by taking the exponential of the above expression. By the same argument as in the proof of Proposition 3.2, we



have

$$\begin{aligned}
& \kappa(Y_{i_1 i_2}, Y_{i_2 i_3}^*, Y_{i_3 i_4}, Y_{i_4 i_1}^*) \\
&= \frac{1}{n_0} \left( \frac{\sigma_w^2 \sigma_x^2}{(2\pi)^2} \int \widehat{f}'(t_1) \widehat{f}'(t_2) \exp \left( -\frac{\sigma_w^2 \sigma_x^2 + \sigma_b^2}{2} (t_1^2 + t_2^2) - \sigma_b^2 t_1 t_2 \right) dt_1 dt_2 \right)^2 + \mathcal{O}(n_0^{-3/2}) \\
&= \left( \frac{1}{2\pi \sqrt{\sigma_w^2 \sigma_x^2 (\sigma_w^2 \sigma_x^2 + 2\sigma_b^2)}} \int f(x_1) f(x_2) e^{-\frac{1}{2} \langle \mathbf{x}, \Sigma^{-1} \mathbf{x} \rangle} d\mathbf{x} \right)^2 \\
&+ \frac{1}{n_0} \left( \frac{\sigma_w^2 \sigma_x^2}{2\pi \sqrt{\sigma_w^2 \sigma_x^2 (\sigma_w^2 \sigma_x^2 + 2\sigma_b^2)}} \int f'(x_1) f'(x_2) e^{-\frac{1}{2} \langle \mathbf{x}, \Sigma^{-1} \mathbf{x} \rangle} d\mathbf{x} \right)^2 + \mathcal{O}(n_0^{-3/2}),
\end{aligned}$$

where  $\Sigma$  is the matrix defined by (29). It then follows that

$$\begin{aligned}
\kappa(Y_{i_1 i_2}, Y_{i_2 i_3}^*, Y_{i_3 i_4}, Y_{i_4 i_1}^*) &\approx \mathbf{E} Y_{i_1 i_2} Y_{i_2 i_3}^* Y_{i_3 i_4} Y_{i_4 i_1}^* - \mathbf{E} Y_{i_1 i_2} Y_{i_4 i_1}^* \mathbf{E} Y_{i_2 i_3}^* Y_{i_3 i_4} \\
&= \theta_2(f)^2 n_0^{-1} \left( 1 + \mathcal{O}(n_0^{-1/2}) \right),
\end{aligned}$$

as desired. The proof for  $k > 2$  is similar.  $\square$

## C Proofs of auxiliary results

*Proof of Lemma 3.1.* By applying the Fourier inversion theorem, we have

$$\mathbf{E} X_1 f(\mathbf{X}) = \frac{1}{(2\pi)^n} \int_{\mathbb{R}^n} \int_{\mathbb{R}^n} x_1 f(\mathbf{x}) e^{-it \cdot \mathbf{x}} \varphi_{\mathbf{X}}(t) d\mathbf{x} dt,$$

where  $\varphi_{\mathbf{X}}(t)$  is the characteristic function of the  $n$ -dimensional random vector  $\mathbf{X}$ . It holds that  $\int_{\mathbb{R}^n} (-ix_1) f(\mathbf{x}) e^{-it \cdot \mathbf{x}} d\mathbf{x} = \partial_{t_1} \widehat{f}(t)$ . Then, it follows that

$$\begin{aligned}
\mathbf{E} X_1 f(\mathbf{X}) &= \frac{i}{(2\pi)^n} \int_{\mathbb{R}^n} \left( \partial_{t_1} \widehat{f}(t) \right) \varphi_{\mathbf{X}}(t) dt \\
&= -\frac{i}{(2\pi)^n} \int_{\mathbb{R}^n} \widehat{f}(t) \left( \partial_{t_1} \varphi_{\mathbf{X}}(t) \right) dt \\
&= -\frac{i}{(2\pi)^n} \int_{\mathbb{R}^n} \widehat{f}(t) \left( \partial_{t_1} e^{\log \varphi_{\mathbf{X}}(t)} \right) dt \\
&= -\frac{i}{(2\pi)^n} \int_{\mathbb{R}^n} \widehat{f}(t) \left( \partial_{t_1} \log \varphi_{\mathbf{X}}(t) \right) \varphi_{\mathbf{X}}(t) dt.
\end{aligned}$$

Cumulants can also be defined in an analytical way as the coefficients of the log-characteristic function

$$\log \mathbf{E} e^{it \cdot \mathbf{X}} = \sum_{\mathbf{l}} \kappa_{\mathbf{l}} \frac{(it)^{\mathbf{l}}}{\mathbf{l}!}, \quad (30)$$

where  $\sum_{\mathbf{l}}$  is the sum over all multi-indices  $\mathbf{l} = (l_1, \dots, l_n) \in \mathbb{N}^n$ . We note that  $\kappa_{\mathbf{l}}(X_1, \dots, X_n) = \kappa(\{X_1\}^{l_1}, \dots, \{X_n\}^{l_n})$  means that  $X_i$  appears  $l_i$  times. One can prove that this definition of cumulants is equivalent to the combinatorial one given by 14 (see [24] for a proof). Using definition (30) results in

$$\partial_{t_1} \log \varphi_{\mathbf{X}}(t) = i \sum_{\mathbf{l}} \kappa_{\mathbf{l} + \mathbf{e}_1} \frac{(it)^{\mathbf{l}}}{\mathbf{l}!},$$

where  $\mathbf{l} + \mathbf{e}_1 = (l_1 + 1, l_2, \dots, l_n)$ . Since  $(it)^{\mathbf{l}} \widehat{f}(t) = \widehat{f^{(\mathbf{l})}}(t)$ , we finally obtain

$$\mathbf{E} X_1 f(\mathbf{X}) = \sum_{\mathbf{l}} \frac{\kappa_{\mathbf{l} + \mathbf{e}_1}}{\mathbf{l}!} \frac{1}{(2\pi)^n} \int_{\mathbb{R}^n} \widehat{f^{(\mathbf{l})}}(t) \varphi_{\mathbf{X}}(t) dt = \sum_{\mathbf{l}} \frac{\kappa_{\mathbf{l} + \mathbf{e}_1}}{\mathbf{l}!} \mathbf{E} f^{(\mathbf{l})}(\mathbf{X}),$$

where we again applied the Fourier inversion formula.  $\square$

*Proof of Lemma A.1.* Let  $\Delta^{i,j}$  denote a  $m \times n_1$  matrix such that  $\Delta_{kl}^{i,j} = \mathbf{1}_{\{(i,j)=(k,l)\}}$ . Then, applying the resolvent identity, we get

$$\frac{\partial G}{\partial Y_{ij}^*} = \lim_{\epsilon \rightarrow 0} \frac{\left( \frac{Y(Y^* + \epsilon \Delta^{i,j})}{m} - z \right)^{-1} - \left( \frac{YY^*}{m} - z \right)^{-1}}{\epsilon} = -\frac{GY \Delta^{i,j} G}{m}.$$

It follows that  $\partial_{Y_{ij}^*} G_{ab} = -\left(\frac{GY}{m}\right)_{ai} G_{jb}$  for  $1 \leq a, b \leq n_1$ ,  $1 \leq i \leq m$ , and  $1 \leq j \leq n_1$ . Therefore, we have

$$\partial_{Y_{i_2 i_1}^*} (Y^* G)_{i_2 i_1} = \sum_{j=1}^{n_1} \partial_{Y_{i_2 i_1}^*} (Y_{i_2 j}^* G_{j i_1}) = G_{i_1 i_1} \left( 1 - \left( \frac{Y^* G Y}{m} \right)_{i_2 i_2} \right),$$

which proves (3.6a). We now compute

$$\begin{aligned} \sum_{j=1}^{n_1} \partial_{Y_{i_2 i_3}^*} \partial_{Y_{i_2 k i_1}^*} (Y_{i_2 j}^* G_{j i_1}) &\approx - \sum_{j=1}^{n_1} \partial_{Y_{i_2 i_3}^*} \left( Y_{i_2 j}^* \left( \frac{GY}{m} \right)_{j i_2 k} G_{i_1 i_1} \right) \\ &\approx - \left( \frac{GY}{m} \right)_{i_3 i_2 k} G_{i_1 i_1} + \left( \frac{Y^* G Y}{m} \right)_{i_2 i_2} \left( \frac{GY}{m} \right)_{i_3 i_2 k} G_{i_1 i_1}, \end{aligned}$$

where the approximation in the first line comes from the fact that the contribution of  $\partial_{Y_{i_2 k i_1}^*} Y_{i_2 j}^*$  is very small and can therefore be neglected. Since the off-diagonals of the resolvent of random matrices are small if  $\Im z \gg n_1^{-1}$ , the partial derivative  $\partial_{Y_{i_2 i_3}^*} G_{i_1 i_1}$  can be omitted. This justifies the second approximation. So, we obtain

$$\partial_{Y_{i_2 i_3}^*} \cdots \partial_{Y_{i_2 k i_1}^*} (Y^* G)_{i_2 i_1} \approx - \partial_{Y_{i_3 i_4}^*} \cdots \partial_{Y_{i_2 k-1 i_2 k}^*} \left( \frac{GY}{m} \right)_{i_3 i_2 k} G_{i_1 i_1} \left( 1 - \left( \frac{Y^* G Y}{m} \right)_{i_2 i_2} \right),$$

which completes the proof of Lemma A.1.  $\square$

## D Concentration inequality

*Proof of Lemma 3.4.* Without loss of generality, it suffices to prove the statement w.r.t.  $\mathbf{E}_X$  since by cyclicity the statement for  $\mathbf{E}_W$  is analogous. We write  $X = (\mathbf{x}_1, \dots, \mathbf{x}_m)$  with  $\mathbf{x}_k = (x_{1k}, \dots, x_{n_0 k})'$ , and similarly,  $Y = (\mathbf{y}_1, \dots, \mathbf{y}_m)$ . We denote by  $\mathcal{F}_k$ ,  $1 \leq k \leq m$ , the filtration generated by  $\{\mathbf{x}_l, 1 \leq l \leq k\}$  and by  $\mathbf{E}_k[\cdot] := \mathbf{E}_X[\cdot | \mathcal{F}_k]$  the conditional expectation w.r.t.  $\mathcal{F}_k$ . Now, we decompose  $g(z) - \mathbf{E}_X g(z)$  as a sum of martingale differences

$$D_k := \mathbf{E}_k \operatorname{Tr}(M - z \mathbf{1}_{n_1})^{-1} - \mathbf{E}_{k-1} \operatorname{Tr}(M - z \mathbf{1}_{n_1})^{-1}, \quad \text{for } k = 1, \dots, m.$$

By construction, we have  $\mathbf{E}_m \operatorname{Tr}(M - z \mathbf{1}_{n_1})^{-1} = \operatorname{Tr}(M - z \mathbf{1}_{n_1})^{-1}$  and  $\mathbf{E}_0 \operatorname{Tr}(M - z \mathbf{1}_{n_1})^{-1} = \mathbf{E}_X \operatorname{Tr}(M - z \mathbf{1}_{n_1})^{-1}$ . It then follows that

$$g(z) - \mathbf{E}_X g(z) = \frac{1}{n_1} \sum_{k=1}^m \mathbf{E}_k \operatorname{Tr}(M - z \mathbf{1}_{n_1})^{-1} - \mathbf{E}_{k-1} \operatorname{Tr}(M - z \mathbf{1}_{n_1})^{-1} = \frac{1}{n_1} \sum_{k=1}^m D_k.$$

Next, we define  $M_k := M - \mathbf{y}_k \mathbf{y}_k^*$ . We note that

$$\mathbf{E}_k \operatorname{Tr}(M_k - z \mathbf{1}_{n_1})^{-1} = \mathbf{E}_{k-1} \operatorname{Tr}(M_k - z \mathbf{1}_{n_1})^{-1},$$

since  $M_k$  is independent of  $\mathbf{y}_k$  and therefore is also independent of  $\mathbf{x}_k$ . So, we have

$$D_k = (\mathbf{E}_k - \mathbf{E}_{k-1})[\operatorname{Tr}(M - z \mathbf{1}_{n_1})^{-1} - \operatorname{Tr}(M_k - z \mathbf{1}_{n_1})^{-1}].$$

Then, by the Sherman-Morrison formula, we have

$$\begin{aligned} |\operatorname{Tr}(M - z \mathbf{1}_{n_1})^{-1} - \operatorname{Tr}(M_k - z \mathbf{1}_{n_1})^{-1}| &= \left| \frac{\mathbf{y}_k^* (M_k - z \mathbf{1}_{n_1})^{-2} \mathbf{y}_k}{1 + \mathbf{y}_k^* (M_k - z \mathbf{1}_{n_1})^{-1} \mathbf{y}_k} \right| \\ &\leq \frac{|\mathbf{y}_k^* (M_k - z \mathbf{1}_{n_1})^{-2} \mathbf{y}_k|}{\Im(\mathbf{y}_k^* (M_k - z \mathbf{1}_{n_1})^{-1} \mathbf{y}_k)} \\ &\leq \frac{1}{\Im z}, \end{aligned}$$

where the last inequality follows from the resolvent identity:

$$\begin{aligned} |\mathbf{y}_k^*(M_k - z\mathbf{1}_{n_1})^{-2}\mathbf{y}_k| &\leq \mathbf{y}_k^*(M_k - z\mathbf{1}_{n_1})^{-1}(M_k - \bar{z}\mathbf{1}_{n_1})^{-1}\mathbf{y}_k \\ &= \frac{\mathbf{y}_k^*((M_k - z\mathbf{1}_{n_1})^{-1} - (M_k - \bar{z}\mathbf{1}_{n_1})^{-1})\mathbf{y}_k}{2i\Im z} \\ &= \frac{\Im(\mathbf{y}_k^*(M_k - z\mathbf{1}_{n_1})^{-1}\mathbf{y}_k)}{\Im z}. \end{aligned}$$

Thus,  $|D_k| \leq 2(\Im z)^{-1}$ , and so  $g(z) - \mathbf{E}_X g(z)$  is a sum of bounded martingale differences. We can now apply the Burkholder's inequality which states that for  $\{D_k, 1 \leq k \leq m\}$  being a complex-valued martingale difference sequence, for  $p > 1$ ,

$$\mathbf{E} \left| \sum_{k=1}^m D_k \right|^p \leq C \mathbf{E} \left( \sum_{k=1}^m |D_k|^2 \right)^{p/2},$$

where  $C$  is a positive constant depending on  $p$ . We refer to [5, Lemma 2.12] for a proof of this inequality. By choosing  $p = 4$ , we get

$$\begin{aligned} \mathbf{E}_X |g(z) - \mathbf{E}_X g(z)|^4 &= \frac{1}{n_1^4} \mathbf{E}_X \left| \sum_{k=1}^m D_k \right|^4 \\ &\leq \frac{1}{n_1^4} C \mathbf{E}_X \left( \sum_{k=1}^m |D_k|^2 \right)^2 \\ &\leq \frac{16Cm^2}{n_1^4 (\Im z)^4} = \mathcal{O}(n_1^{-2} (\Im z)^{-4}), \end{aligned}$$

just as claimed. □

## E Complex case

**Remark E.1.** We can also consider matrices  $X \in \mathbb{C}^{n_0 \times m}$  and  $W \in \mathbb{C}^{n_1 \times n_0}$  of complex random entries with zero mean and variance  $\mathbf{E}|X_{ij}|^2 = \sigma_x^2$  and  $\mathbf{E}|W_{ij}|^2 = \sigma_w^2$ . Let  $M = \frac{1}{m} Y Y^*$  with  $Y = f\left(\frac{WX}{\sqrt{n_0}}\right)$ , and let  $f: \mathbb{C} \rightarrow \mathbb{R}$  be a real-differentiable function satisfying  $\int_{\mathbb{C}} f(\sigma_w \sigma_x z) \frac{e^{-|z|^2}}{\pi} d^2 z = 0$ .

Set  $\theta_1(f) = \int_{\mathbb{C}} |f(\sigma_w \sigma_x z)|^2 \frac{e^{-|z|^2}}{\pi} d^2 z$ . Then, it can be proved that the normalized trace of the resolvent of  $M$  satisfies equation (7).
